# Supplementary material for: Tailoring the surface-oxygen defects of a tin dioxide support towards an enhanced electrocatalytic performance of platinum nanoparticles
Source: Royal Society of Chemistry journal article supplement (doi:10.1039/c5cp04714e), 2015-09-02
Supplement: c5cp04714e1.pdf [file c5cp04714e1.pdf]

## Electronic Supplementary Information

### **Tailoring the Surface-oxygen Defects of Tin Dioxide Support toward Enhanced Electrocatalytic Performance of Platinum Nanoparticles**

*Maidhily Manikandan,<sup>†,‡</sup> Toyokazu Tanabe,<sup>†,§,\*</sup> Gubbala V. Ramesh,<sup>†</sup> Rajesh Kodiyath,<sup>†</sup>  
Shigenori Ueda,<sup>§§</sup> Yoshiki Sakuma,<sup>†</sup> Yusaku Homma,<sup>†</sup> Arivuoli Dakshanamoorthy,<sup>‡</sup> Katsuhiko  
Ariga<sup>§§§</sup> and Hideki Abe<sup>†,\*</sup>*

<sup>†</sup> National Institute for Materials Science, 1-1 Namiki, Tsukuba, Ibaraki 305-0044, Japan.

<sup>‡</sup> Crystal Growth Centre, Anna University, Chennai, Tamil Nadu 600-025, India.

<sup>§</sup> Kanagawa University, 3-27 Rokkakubashi, Yokohama, Kanagawa 221-8686, Japan.

<sup>§§</sup> Synchrotron X-ray Station at SPring-8, National Institute for Materials Science, 1-1-1 Kouto, Sayo, Hyogo 679-5148, Japan.

<sup>§§§</sup> International Center for Material Nanoarchitectonics, National Institute for Materials Science, 1-1 Namiki, Tsukuba, Ibaraki 305-0044, Japan.

<sup>†</sup> International Center for Young Scientists, National Institute for Materials Science, 1-2-1 Sengen, Tsukuba, Ibaraki 305-0047, Japan.

## **Contents**

### **1. Materials**

### **2. Methods**

- 2.1 Powder X-ray diffractometry (*p*XRD)
- 2.2 Hard X-ray photoemission spectroscopy (HAXPES)
- 2.3 Scanning electron microscopy (SEM)
- 2.4 Transmission electron microscopy (TEM)
- 2.5 X-ray fluorescence spectroscopy (XRF)
- 2.6 Scanning probe microscopy (SPM)
- 2.7 Photoluminescence spectroscopy (PL)
- 2.8 Electrochemical measurements

### **3. Supplementary Figures**

- 3.1 XRF spectra
- 3.2 HAXPES spectra
- 3.3 TEM/SEM images
- 3.4 Raman spectra
- 3.5 Electrochemical profiles
- 3.6 PL spectra
- 3.7 Energy diagram
- 3.8 AFM/KFM images

## 1. Materials

Tin (II) chloride dihydrate ( $\text{SnCl}_2 \cdot 2\text{H}_2\text{O}$ , 99.995 %, trace metal basis, Sigma Aldrich), sodium citrate dihydrate ( $\text{Na}_3\text{C}_6\text{H}_5\text{O}_7 \cdot 2\text{H}_2\text{O}$ ,  $\geq 99$  %, Sigma Aldrich), sodium hydroxide ( $\text{NaOH}$ ,  $\geq 99.99$  %, Sigma Aldrich), hydrogen peroxide ( $\text{H}_2\text{O}_2$ , 30 %, Wako), chloroplatinic acid hexahydrate ( $\text{H}_2\text{PtCl}_6 \cdot 6\text{H}_2\text{O}$ , ACS reagent  $\geq 37$  % Pt basis Sigma Aldrich,) and sodium borohydride ( $\text{NaBH}_4$ , 0.1 M,  $\geq 99.99\%$ , Aldrich) were used as received.

## 2. Methods

### 2.1 Powder X-ray diffractometry (pXRD)

Powder X-ray diffractometry (pXRD) was performed using  $\text{CuK}_\alpha$  radiation (Panalytical X'Pert PRO;  $\lambda = 0.1548$  nm) with an increment of 0.02 degrees in a range of diffraction angles from 20 to 80 degrees. An obliquely finished Si crystal (non-reflection Si plate) was used as a sample holder to minimize the background.

### 2.2 Hard X-ray photoemission spectroscopy (HAXPES)

Hard X-ray photoemission spectroscopy (HAXPES) was performed using X-rays with photon energy of 5.95 keV at the undulator beamline BL15XU of SPring-8, Japan. Sample powder was first dispersed in tetrahydrofuran (THF) and dropped onto a carbon substrate. The sample was thoroughly dried in air and transferred into an ultra-high-vacuum (UHV) chamber attached to a high-resolution electron spectrometer (VG Scienta R4000). Total energy resolution was set to 240 meV. The binding energy of photoelectrons was referred to the Fermi energy of an Au film that was electrically contacted to the sample. The measurements were performed at room temperature.

### 2.3 Scanning electron microscopy (SEM)

A scanning electron microscope (Hitachi S-8000, accelerating voltage = 5.0 kV) was used for the morphological analysis of synthesized catalysts.

### 2.4 Transmission electron microscopy (TEM)

Transmission electron microscopy (TEM) images were obtained with a JEOL 2100-F microscope with an operating voltage of 200 kV. The composition of the SnO<sub>2</sub> NFs was analyzed with an energy-dispersion spectroscopy (EDS, Oxford link system) analyzer, which was attached to the TEM. The sample for TEM was prepared by dropping a methanol suspension of the sample powder onto a copper micro grid. The sample was thoroughly dried in vacuum prior to observation.

## **2.5 X-ray fluorescence spectroscopy (XRF)**

XRF spectra were obtained with a micro XRF analyzer, Orbis I (EDAX). Samples were dispersed in isopropanol, dropped onto carbon substrates and thoroughly dried in air.

## **2.6 Scanning probe microscopy (SPM)**

A scanning probe microscope (JSPM-5200, JEOL), equipped with a tip material of monolithic Silicon (Electrical conductive coating of 5.0 nm chromium and 25 nm Platinum on the both sides of cantilever, 3.0 Nm<sup>-1</sup> force constant) was used to visualize all the KFM/AFM images. All images were collected in non-contact mode at a scan rate of 15-75 kHz.

## **2.7 Photoluminescence spectroscopy (PL)**

PL spectra were measured at 10 K and 300 K by using a 32 cm-length monochromator (Jobin Yvon HR320) equipped with a liquid-nitrogen-cooled Si-CCD detector. The samples were placed in an optical cryostat and excited with a 325 nm He-Cd laser source of 1.4 mW output power.

## **2.8 Electrochemical measurements**

A glassy carbon (GC) electrode (5 mm in diameter, PINE) was polished prior to use with Gamma Micropolish Alumina (Baikalsox, Type 0.05 μm CR). The GC electrode was rinsed with Milli-Q water and finally dried in air. An aliquot of 1.8 mg of the sample powder was suspended in a mixture of 1745 μl of milliQ water, 440 μl of isopropyl alcohol, and 18 μl of a 5.0 % w/w lower aliphatic alcohols-water solution of Nafion (EW: 1100, Aldrich). After sonication for 60 min, the suspension (28 μg<sub>Pt</sub> cm<sup>-2</sup> present on the electrode surface) was dropped onto the GC electrode and dried at 60 °C in air. Cyclic voltammetric (CV) measurements were performed

using a computer-controlled electrochemical system (HSV-100, Hokuto Denko) in a three-electrode, one-compartment electrochemical cell (main compartment volume = 100 ml, PINE Co.). A Pt wire and an Ag/AgCl electrode (4.0 M KCl, PINE Co.) were used as the counter electrode and the reference electrode, respectively. All the voltammograms were acquired at room temperature at a potential sweep rate of 20 mVs<sup>-1</sup>. The electrochemical surface area (ECSA) of the sample was determined by measuring the columbic charge for hydrogen under potential adsorption/desorption between -0.16 and +0.20 V, assuming 210  $\mu\text{C cm}^{-2}$  for a monolayer of adsorbed hydrogen on the platinum surface.

Stability of the Pt/SnO<sub>2</sub> NFs, Pt/SnO<sub>2</sub> NPs and Pt/C (20 wt%; E-TEK) was examined by repeatedly cycling the electrode between +0.6 and +1.2 V at a sweep rate of 50 mVs<sup>-1</sup> in 0.5 M aqueous solution of H<sub>2</sub>SO<sub>4</sub>. Electro-oxidation of ethanol (Chameleon reagent) was carried out in aqueous solution of 1.0 M ethanol+0.5 M H<sub>2</sub>SO<sub>4</sub>, where the solution was de-aerated with pure Ar gas for 30 min in prior to the measurements. Before performing the electro-oxidation of ethanol, background currents were measured in de-aerated 0.5 M aqueous solution of H<sub>2</sub>SO<sub>4</sub>. CO stripping experiments were conducted at room temperature in 0.5 M aqueous solution of H<sub>2</sub>SO<sub>4</sub>. The solution was first bubbled with pure CO gas (99.9999 %) and subsequently with pure Ar gas while holding the electrode potential at 0.0 V. Two consecutive cyclic voltammogram curves were recorded at 20 mV s<sup>-1</sup> in a potential range between -0.18 to +1.0 V.

### 3. Supporting Figures

#### 3.1. XRF

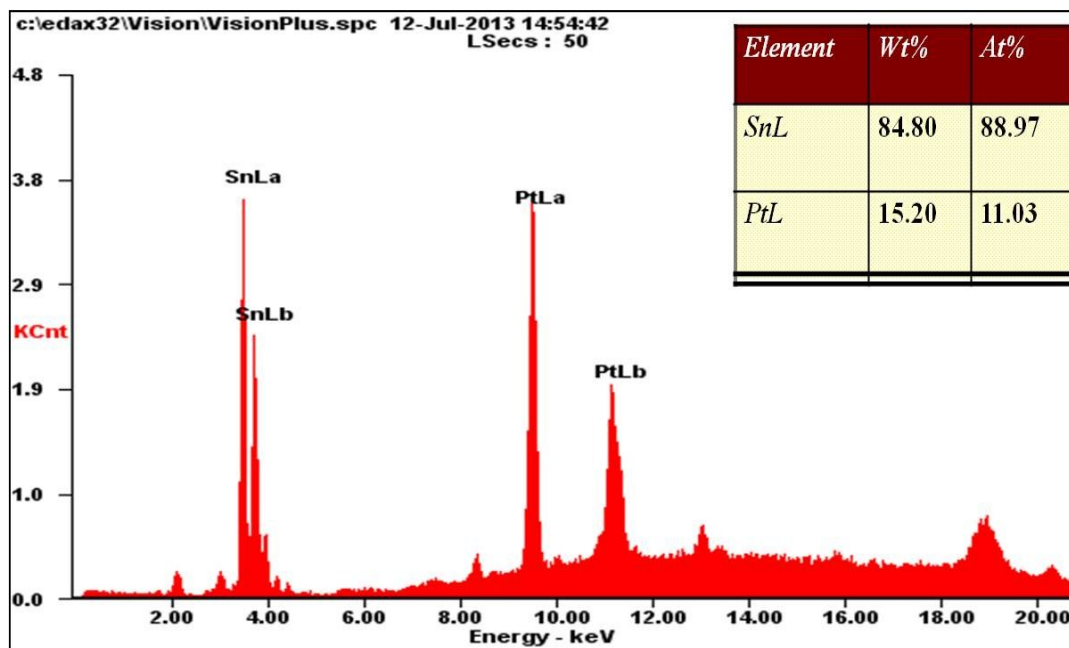

**S1.** X-ray fluorescence analysis on the Pt/SnO<sub>2</sub> NFs. The weight percentage is provided as an average of the values obtained at two different points.

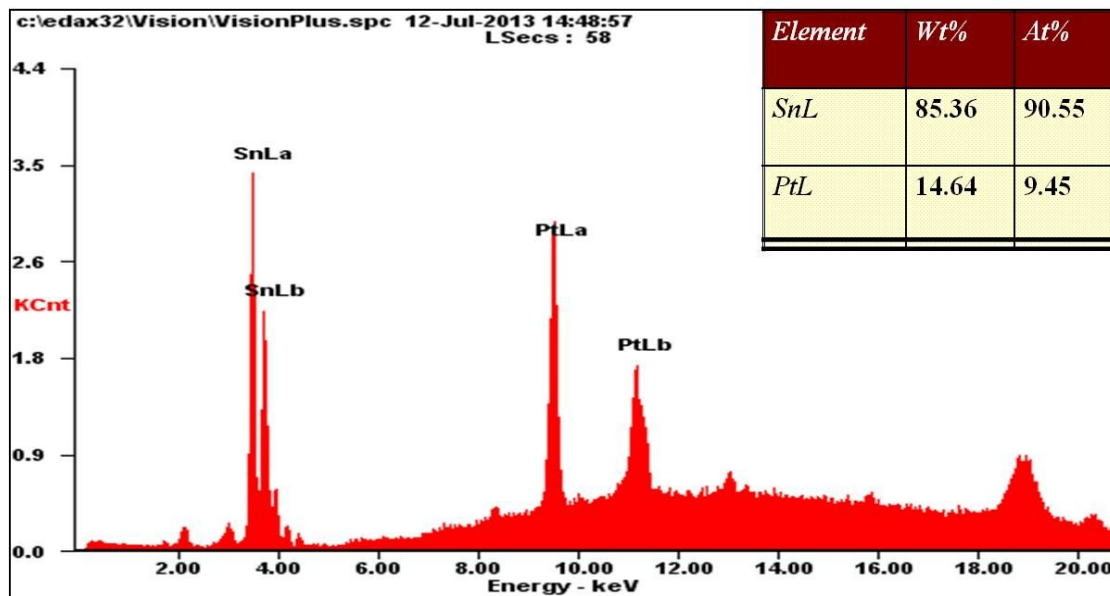

**S2.** X-ray fluorescence analysis on the Pt/SnO<sub>2</sub> NPs. The weight percentage is provided as an average of the values obtained at two different points.

### 3.2. HAXPES

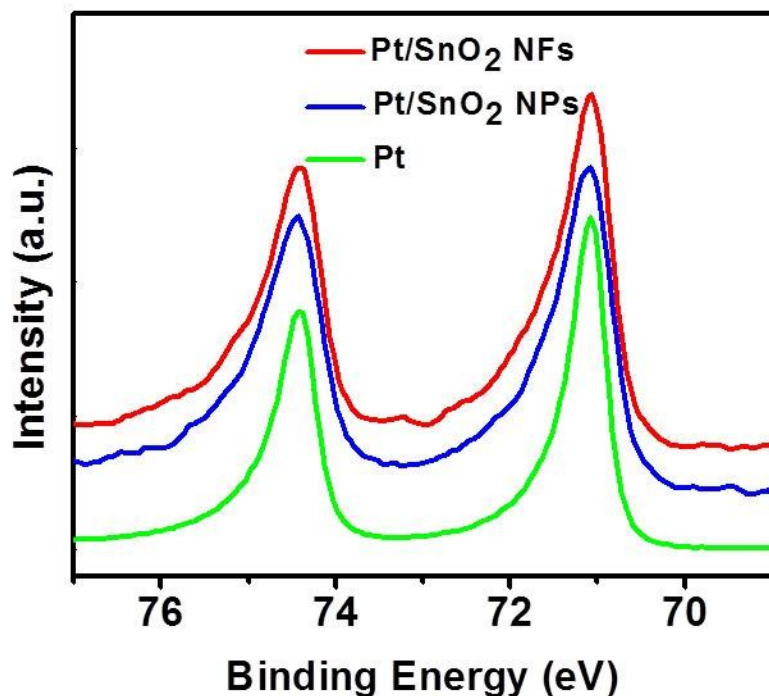

**S3.** HAXPES spectra in the Pt 4*f* region for the Pt/SnO<sub>2</sub> NFs, Pt/SnO<sub>2</sub> NPs and Pt standard. Note that the Pt 4*f* spectra for the Pt/SnO<sub>2</sub> materials are different from that for a control sample, Pt nanoparticles. This difference is attributed to Pt<sup>+δ</sup> atoms at the Pt/SnO<sub>2</sub> interface. On the other hand, the HAXPES spectra in the Sn-core region are virtually the same regardless of the materials (Figure 1E). The Pt NPs are immobilized on the support surface mostly through Pt<sup>+δ</sup>-oxygen bonds, resulting in the enhanced O 1*s* peak at binding energy = 533.0 eV for the Pt/SnO<sub>2</sub> NFs (Figure 1F).

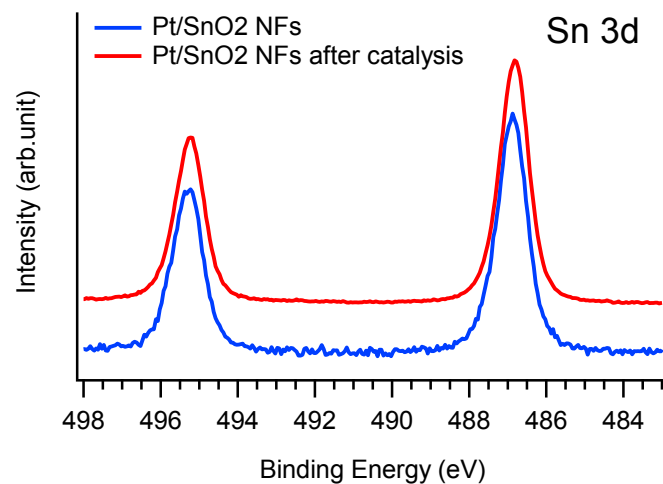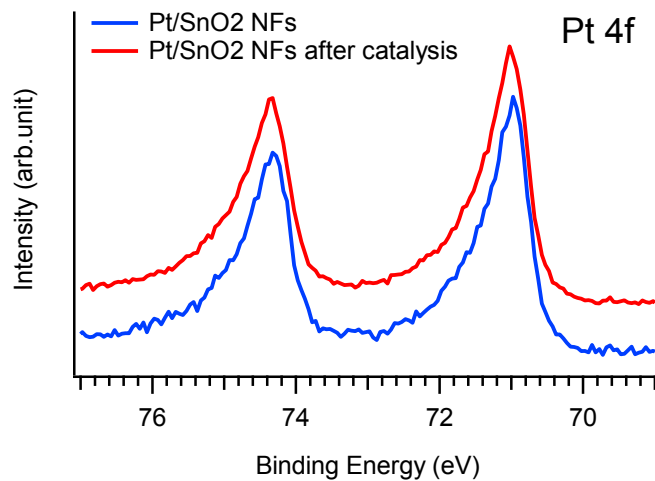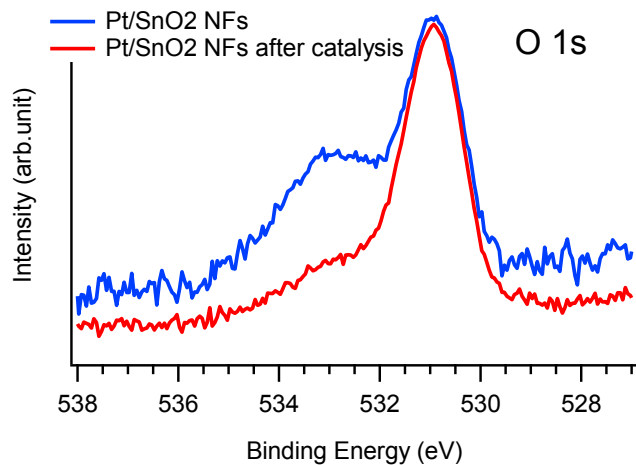

**S4.** HAXPES spectra for the Pt/SnO<sub>2</sub> NFs before and after the 10000-times repeated potential cycles.



### 3.3. TEM/SEM

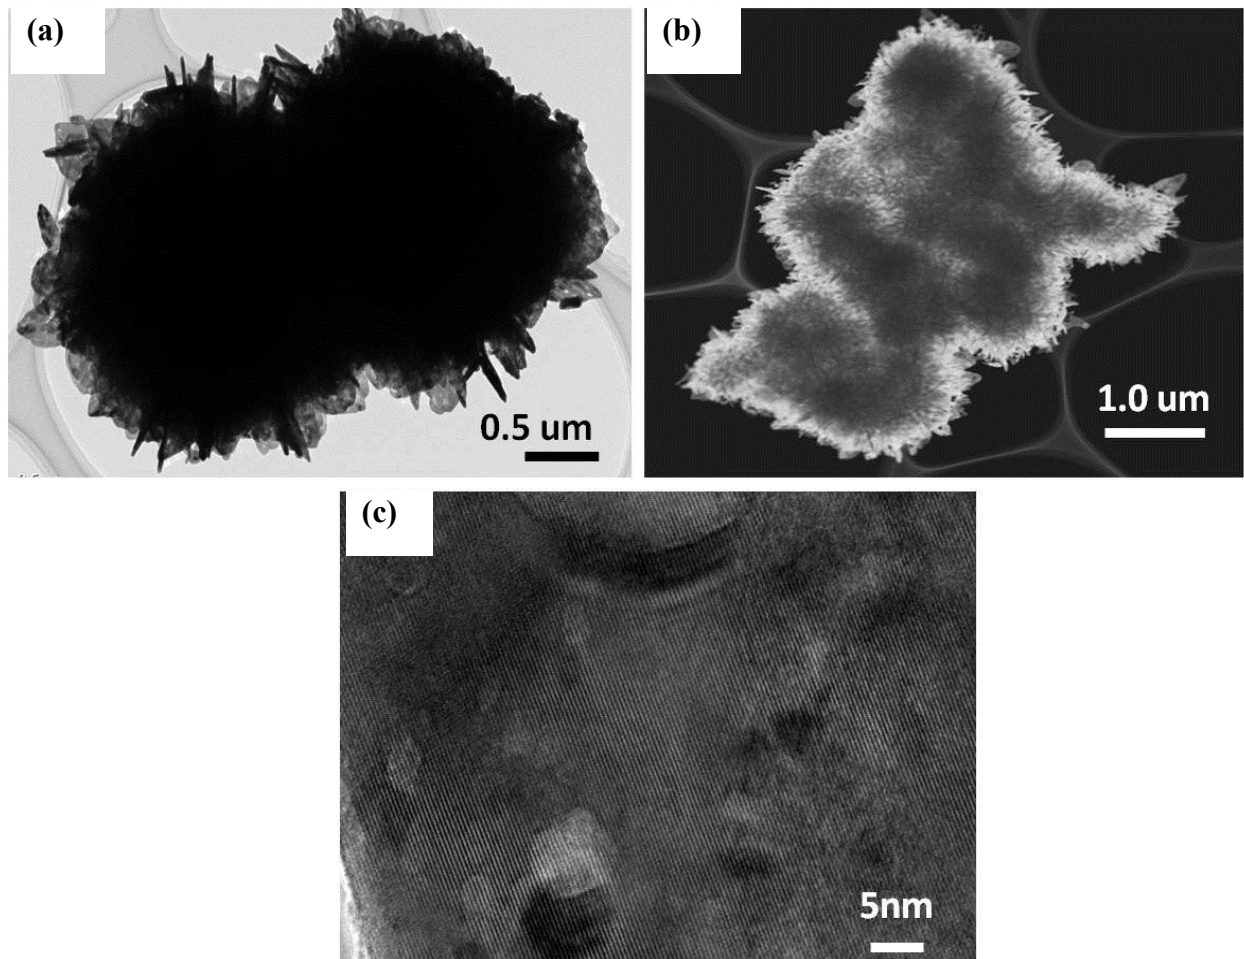

**S5.** (a) TEM-, (b) STEM- and (c) HRTEM images of the  $\text{SnO}_2$  NFs.

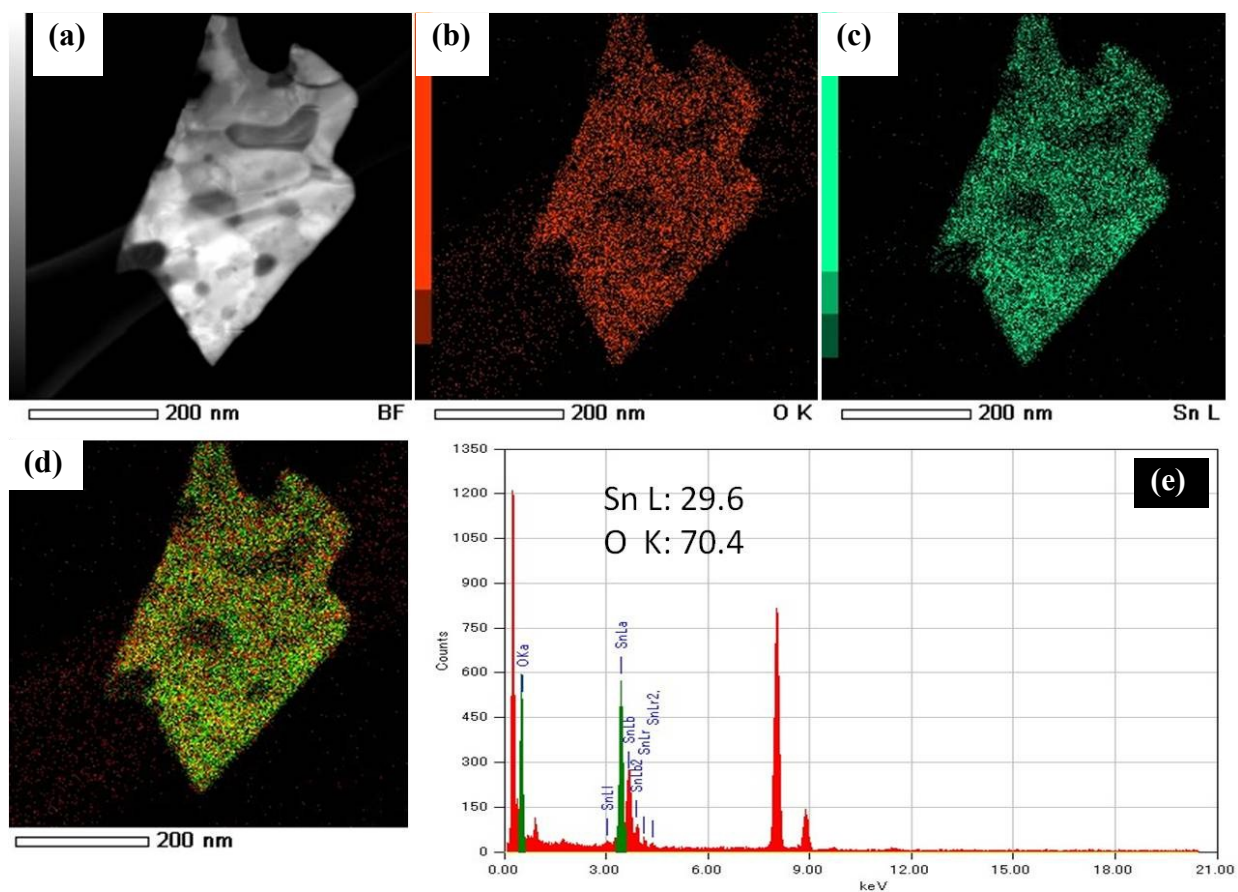

**S6.** (a) Annular-dark field image, (b-c) elemental-mapping images, (d) composite image and (e) elemental-analysis spectrum for the SnO<sub>2</sub> NFs.

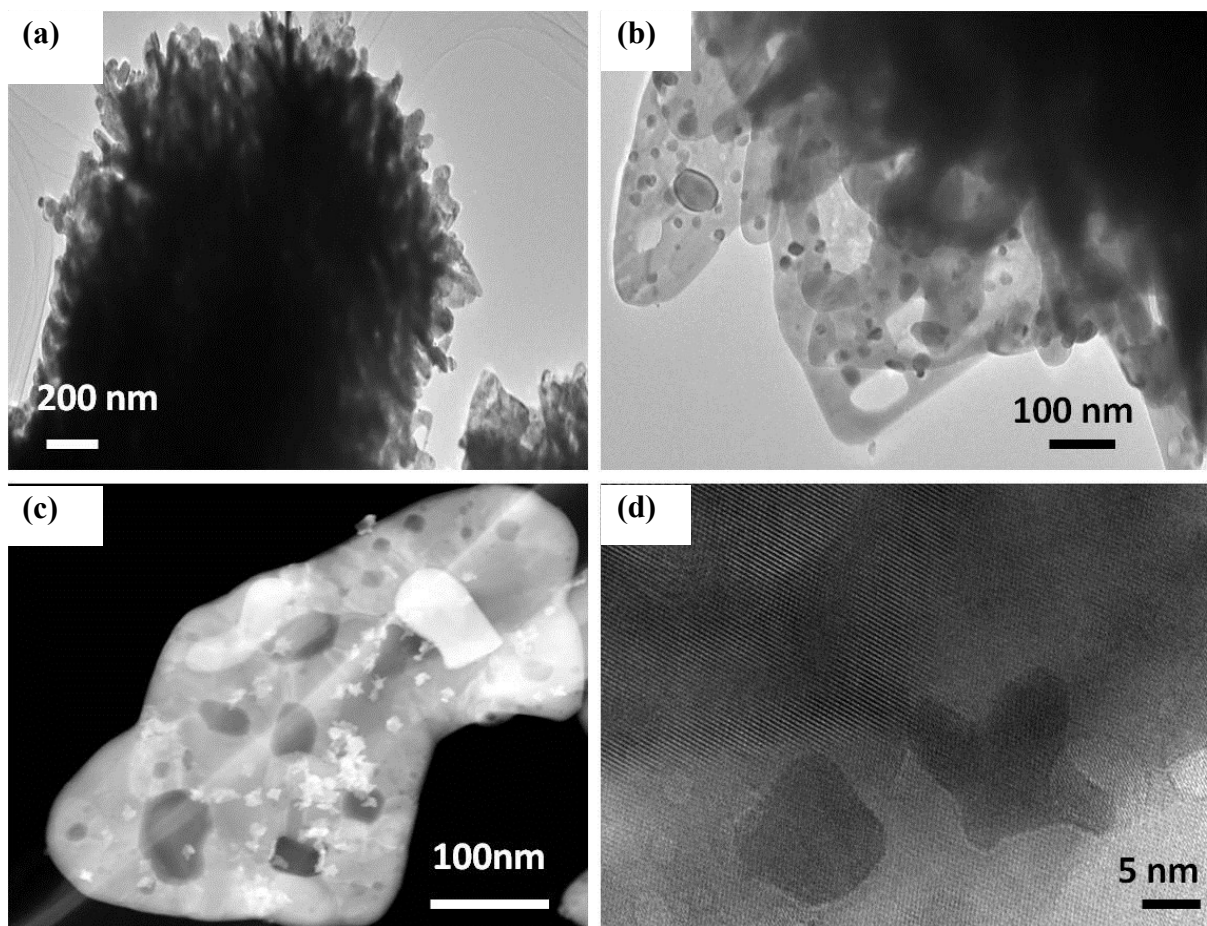

**S7.** (a,b) HRTEM images of the Pt/SnO<sub>2</sub> NFs at low magnification. (c) Annular-dark field image at low magnification and (d) at high magnification of the Pt/SnO<sub>2</sub> NFs.

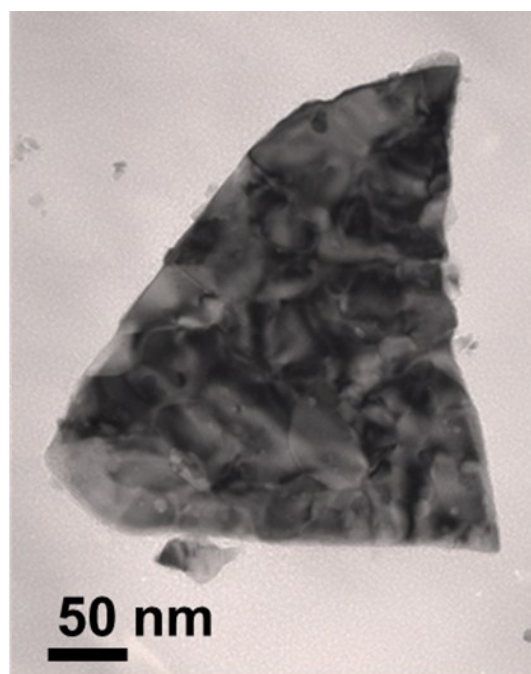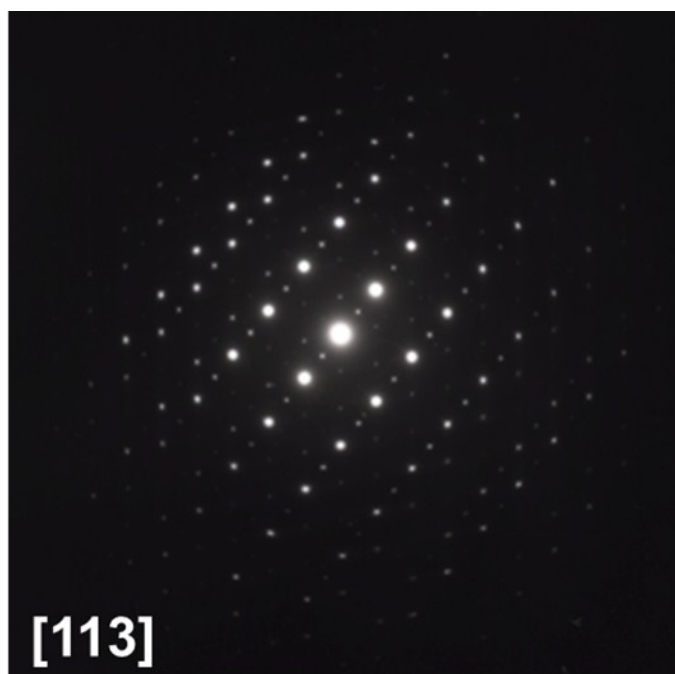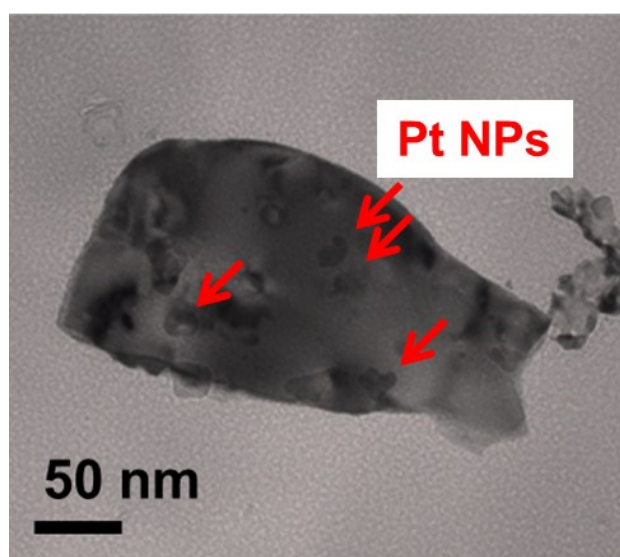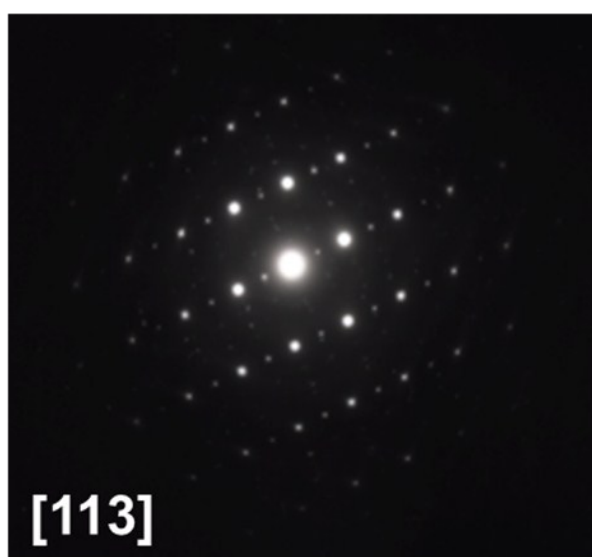

**S8.** TEM images and SAED patterns for the Pt/SnO<sub>2</sub> NFs after repeated catalysis.

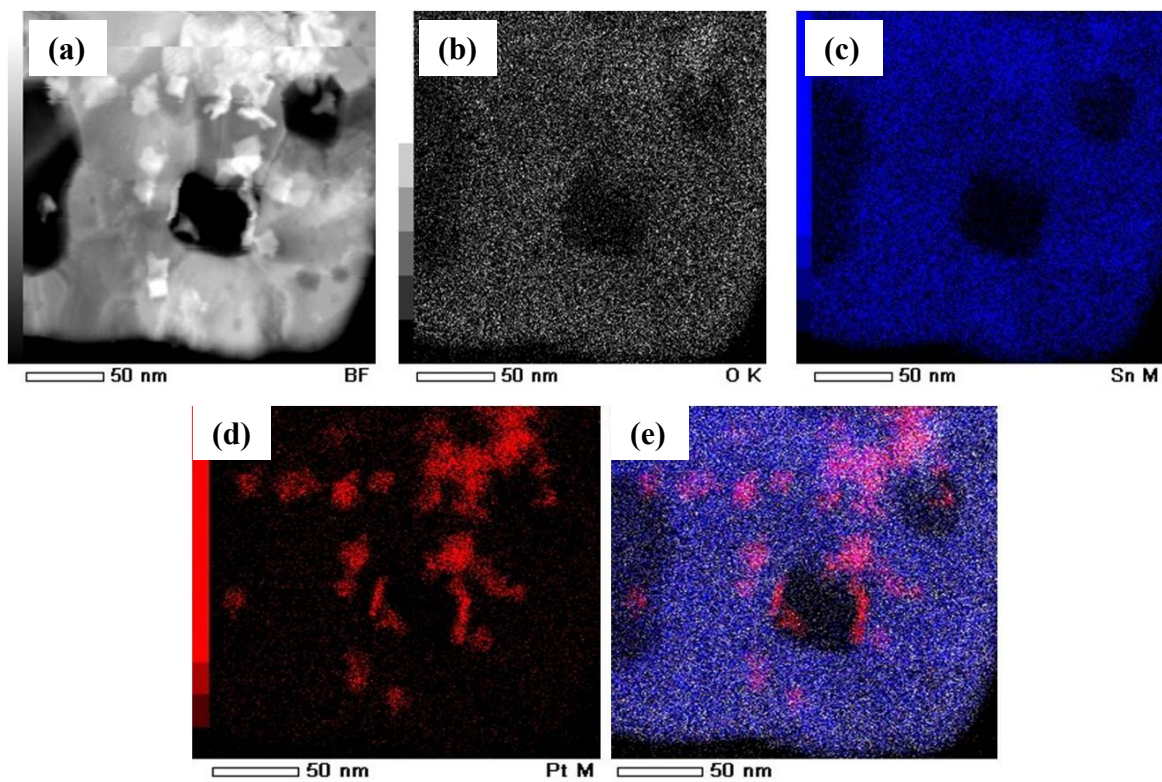

**S9.** (a) Annular-dark field image of the Pt/SnO<sub>2</sub> NFs and the corresponding elemental mapping of (b) O, (c) Sn, (d) Pt and (e) composite image.



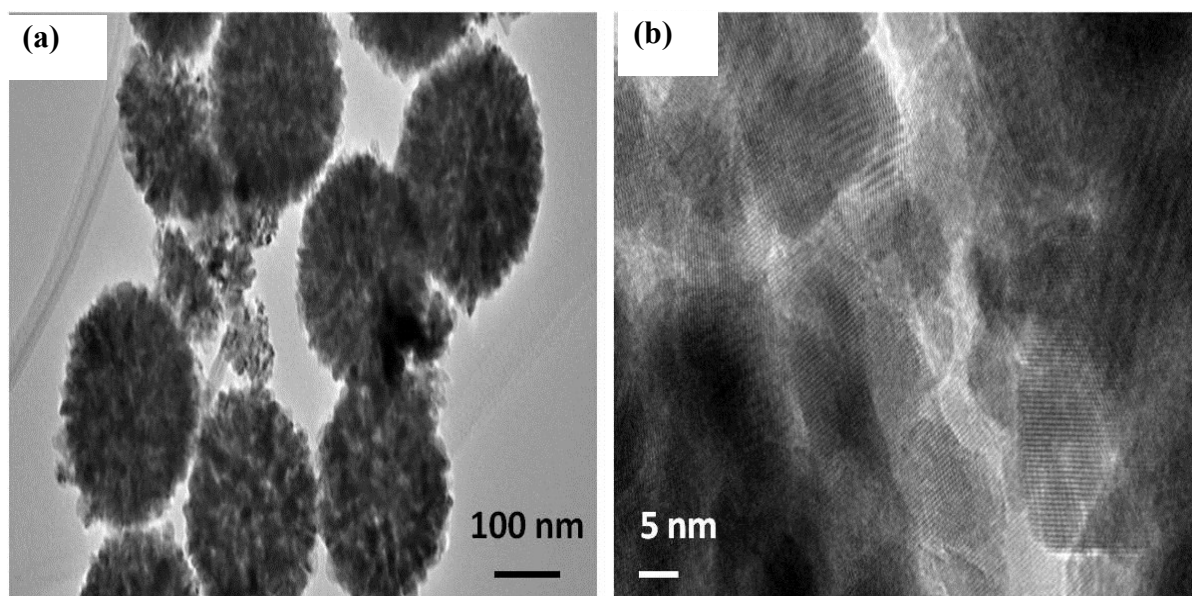

**S10.** (a) Low- and (b) high magnification HRTEM images of the Pt/SnO<sub>2</sub> NPs.

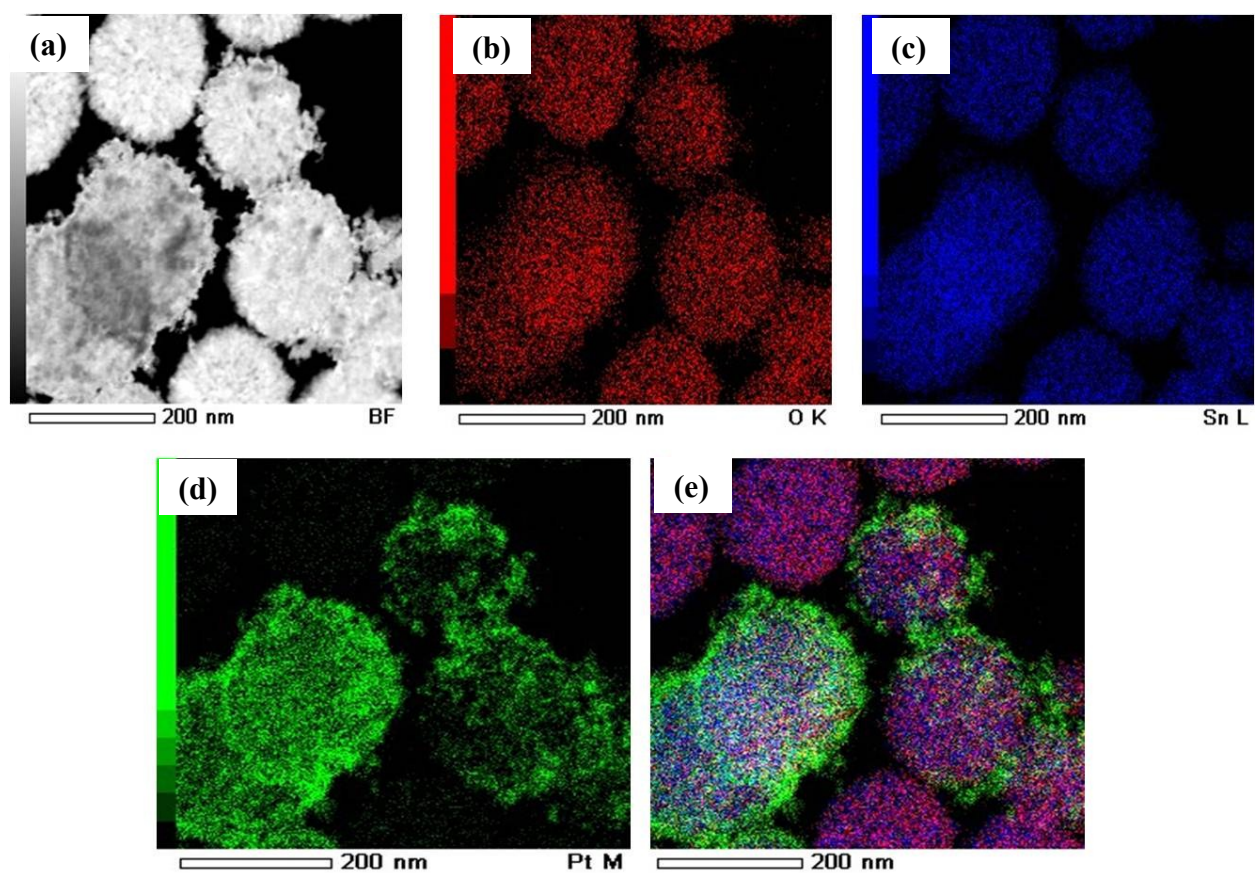

**S11.** (a) Annular-dark field image of the Pt/SnO<sub>2</sub> NPs and the corresponding elemental mapping of (b) O, (c) Sn, (d) Pt and (e) composite image.

### 3.4. Raman spectra

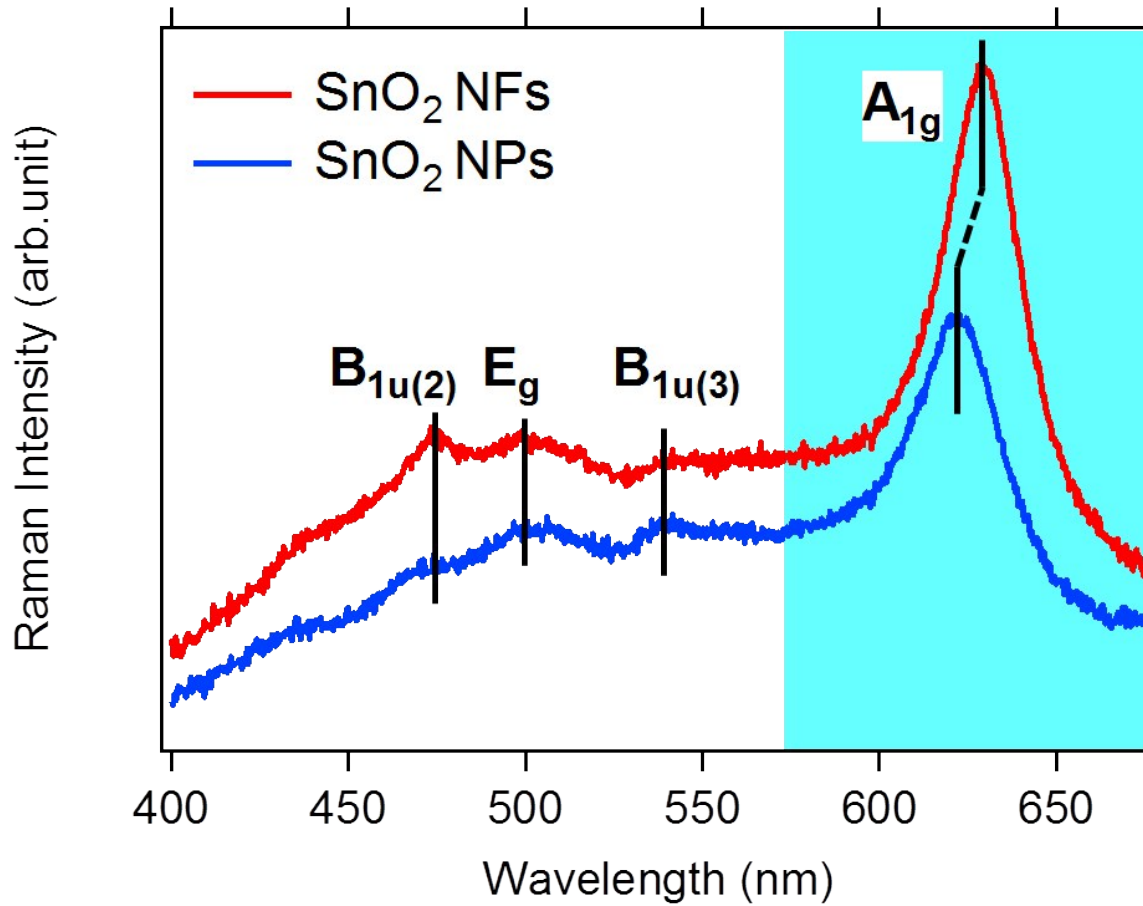

**S12.** Raman spectra for the SnO<sub>2</sub> NFs and SnO<sub>2</sub> NPs. Measurement temperature: 300 K. The A<sub>1g</sub> peaks at 430 nm and 420 nm for the SnO<sub>2</sub> NFs and SnO<sub>2</sub> NPs are attributed to oxygen defects in bridge-site- and sub-bridge-site configurations, respectively (L. Z. Liu, T. H. Li, X. L. Wu, J. C. Shen and P. K. Chu, *J. Raman Spectroscopy*, 2011, **43**, 1423-1426.).



### 3.5. Electrochemical profiles

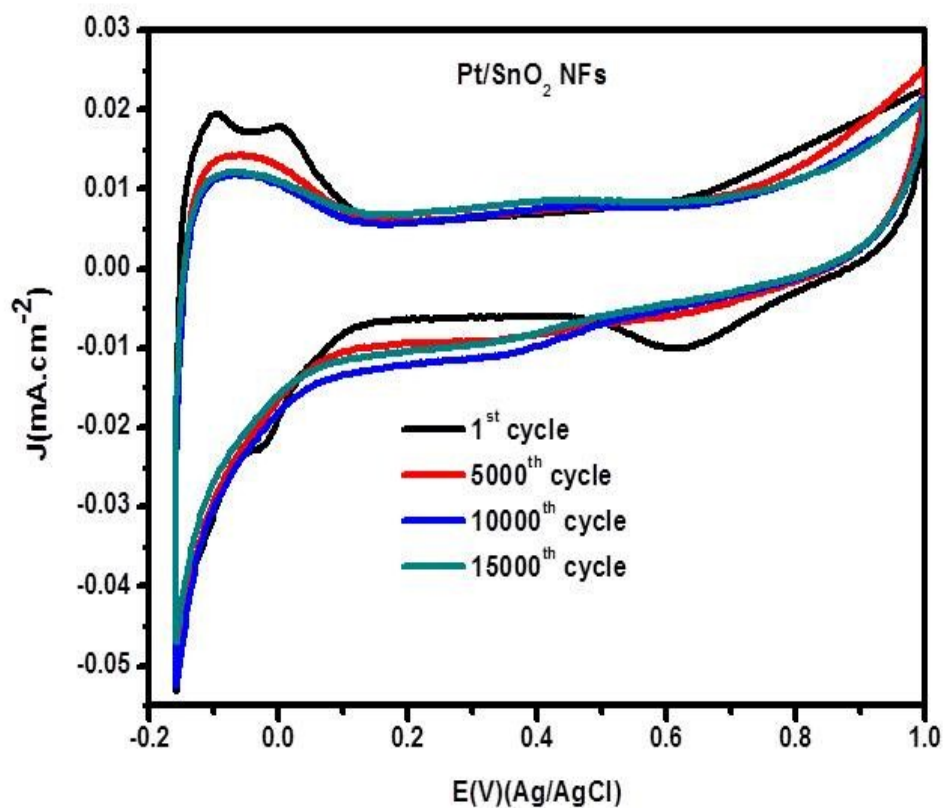

**S13.** Cyclic voltammograms of the Pt/SnO<sub>2</sub> NFs, recorded in between the stability test conducted in 0.5 M H<sub>2</sub>SO<sub>4</sub> between +0.6 and +1.2V at a scan rate of 50 mVs<sup>-1</sup>. The given curves were measured at a scan rate of 20 mVs<sup>-1</sup>.

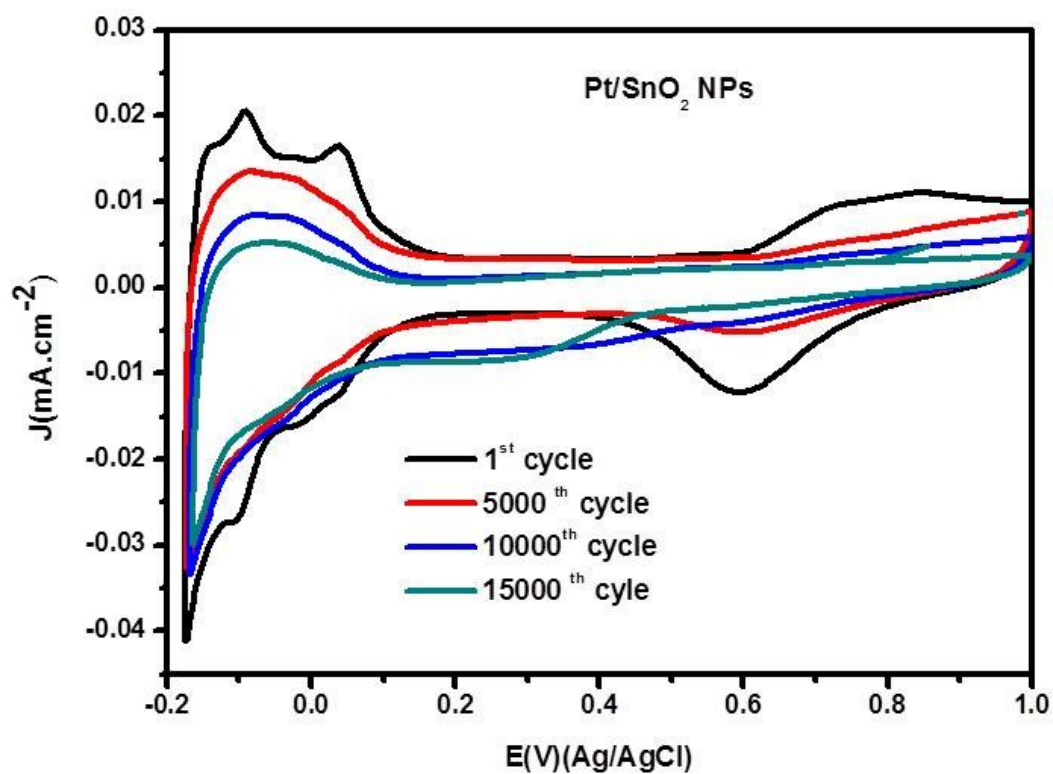

**S14.** Cyclic voltammograms of the Pt/SnO<sub>2</sub> NPs, recorded in between the stability test conducted in 0.5 M H<sub>2</sub>SO<sub>4</sub> between +0.6 and +1.2V at a scan rate of 50 mVs<sup>-1</sup>. The given curves were measured at a scan rate of 20 mVs<sup>-1</sup>.

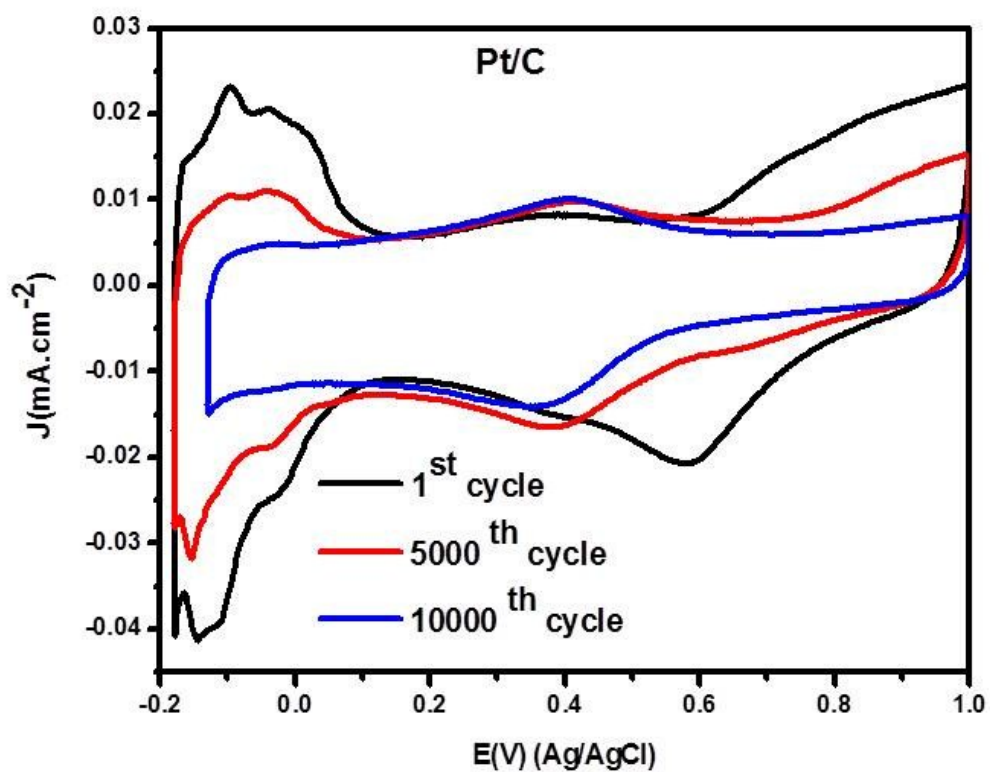

**S15.** Cyclic voltammograms of the Pt/C, recorded in between the stability test conducted in 0.5 M H<sub>2</sub>SO<sub>4</sub> between +0.6 and +1.2V at a scan rate of 50 mVs<sup>-1</sup>. The given curves were measured at a scan rate of 20 mVs<sup>-1</sup>.

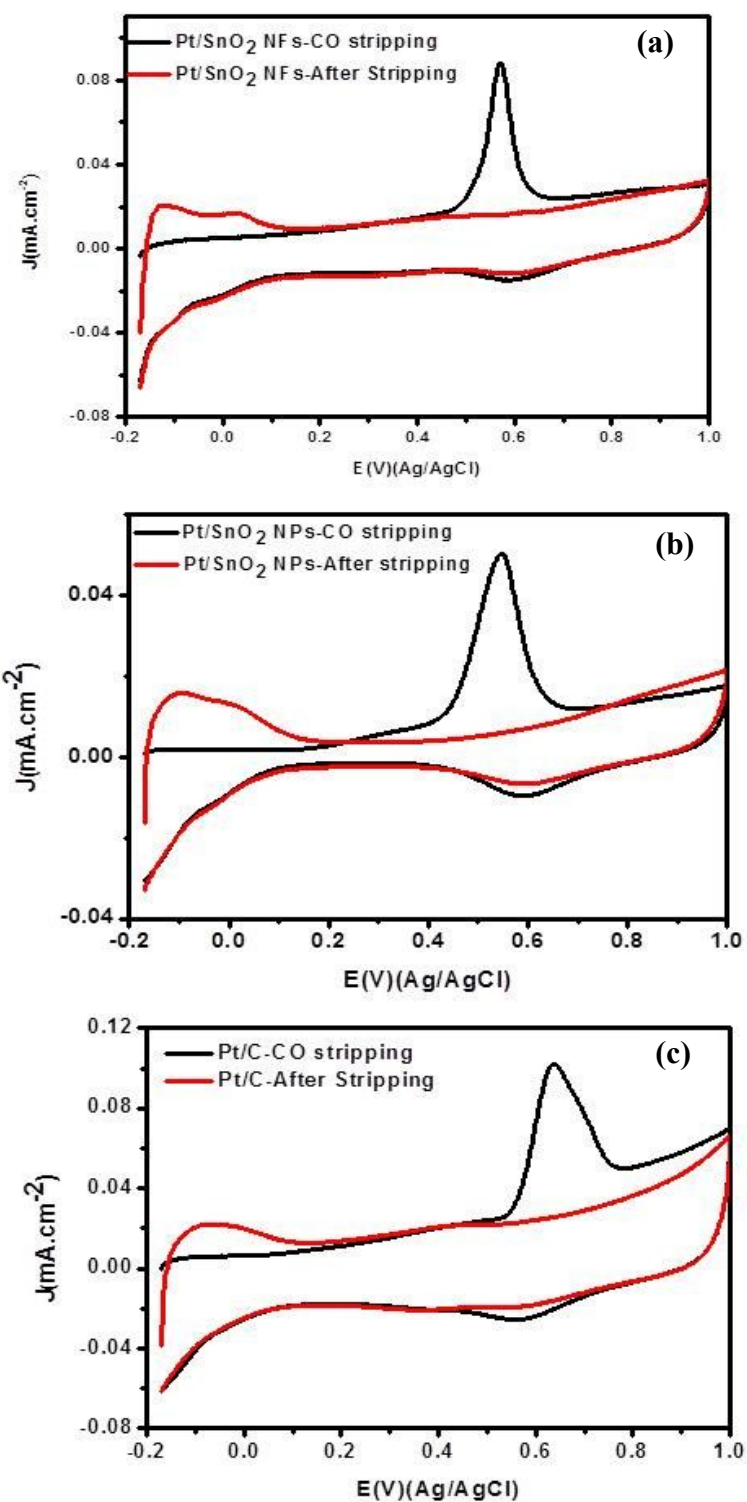

**S16.** CO-stripping profiles for the (a) Pt/SnO<sub>2</sub> NFs and (b) Pt/SnO<sub>2</sub> NPs and (c) Pt/C, acquired in 0.5 M H<sub>2</sub>SO<sub>4</sub> at a scan rate of 20 mVs<sup>-1</sup>.

### 3.7. PL spectra

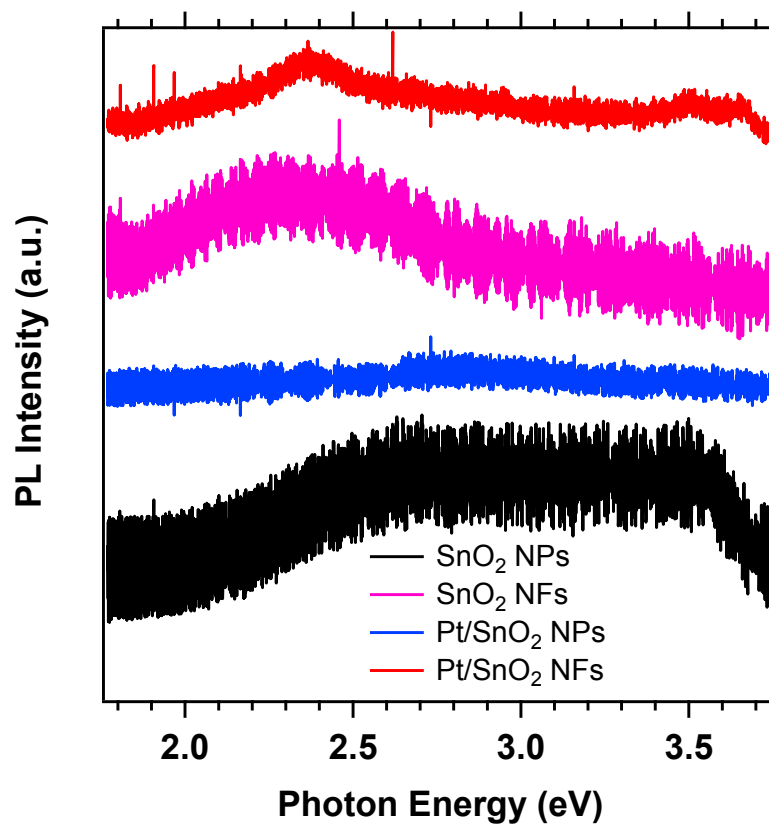

**S17.** PL emission spectra for the Pt/SnO<sub>2</sub> NFs, SnO<sub>2</sub> NFs, Pt/SnO<sub>2</sub> NFs and Pt/SnO<sub>2</sub> NPs. Measurement temperature: 300 K.

### 3.8. Energy diagram

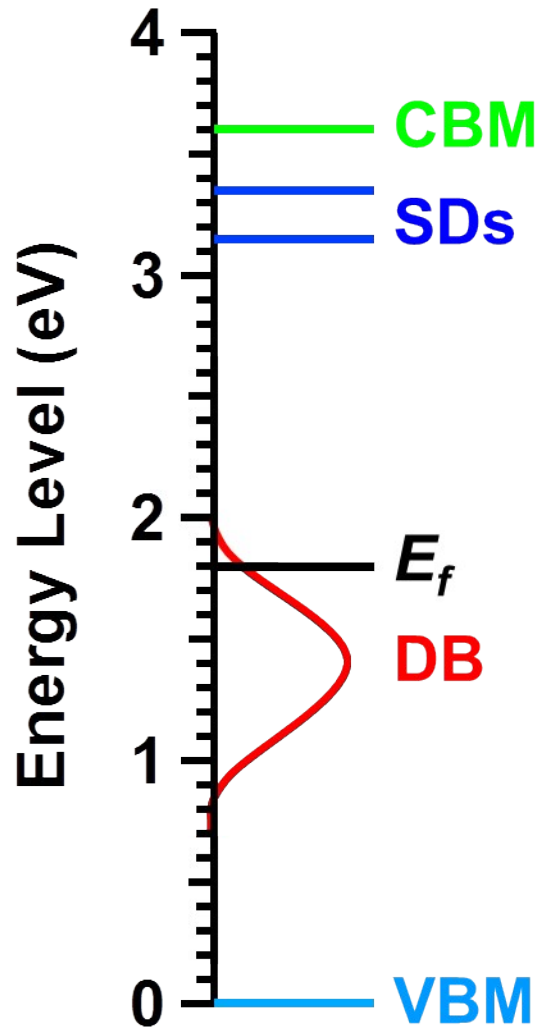

**S18.** Energy diagram for the SnO<sub>2</sub> NFs, experimentally determined by HAXPES and PL. The abbreviations in the panel, CBM, SDs,  $E_f$ , DB and VBM correspond to Conduction-band minimum, Shallow donors, Fermi level, Defect band and Valence-band maximum, respectively.

### 3.9. AFM/KFM

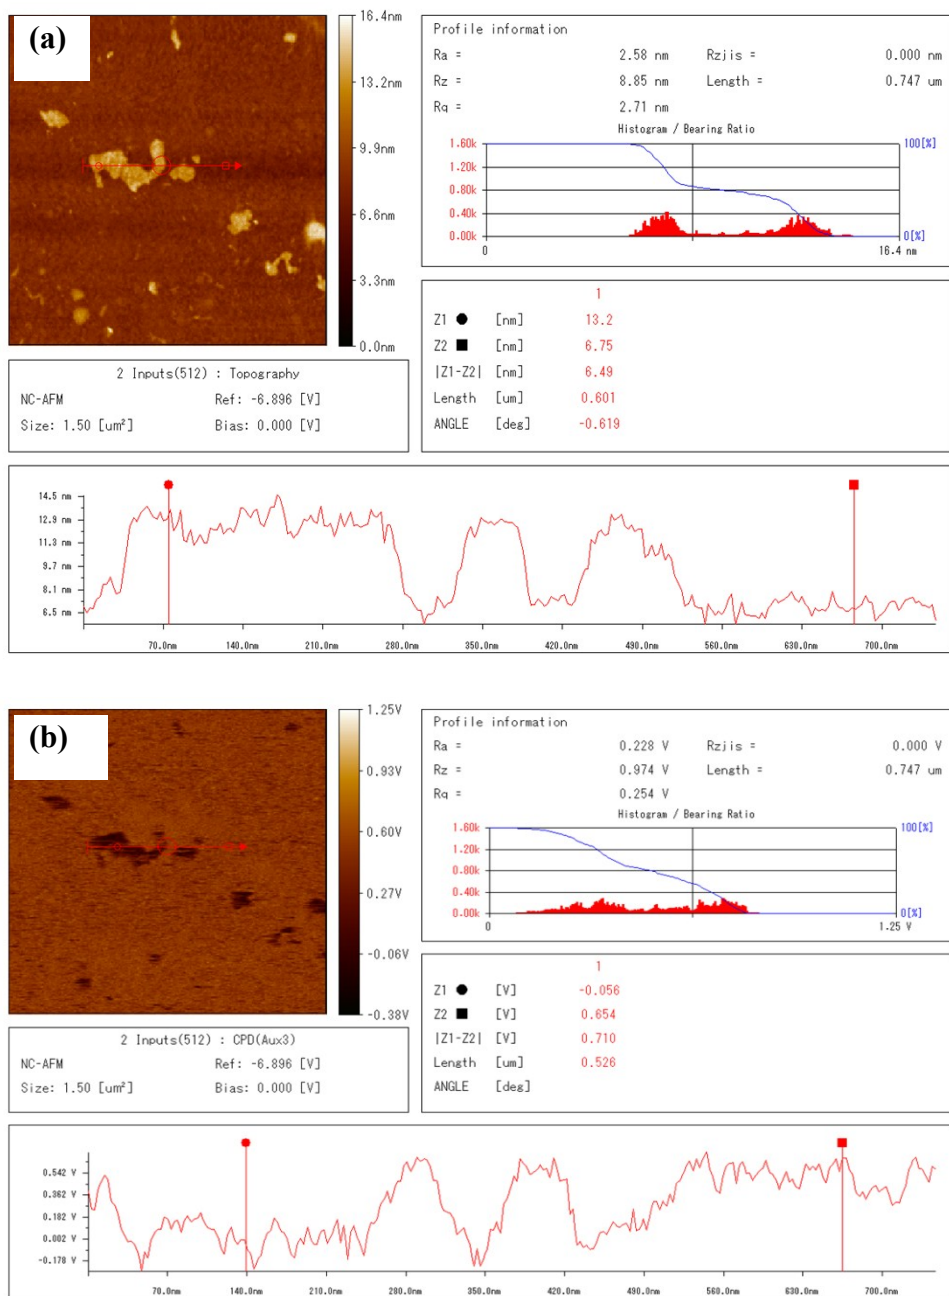

**S19.** Low-magnification (a) AFM- and (b) KFM images of the Pt/SnO<sub>2</sub> NFs.
